# Supplementary material
Source: publisher figshare collection journal article supplement (https://gsapubs.figshare.com/ndownloader/files/23318066)
Supplement: Supplementary file 1 [file 23318066]

## Sheet: Palynofacies PKHB-1
TABLE A4.1. PALYNOFACIES COUNTS FOR PACIFIC POWER HAWKESBURY BUNNERONG DDH 1 (PHKB-1), INCLUDING PERCENTAGES AND PALYNOMORPH CONCENTRATIONS
Depth (m)	Spore-pollen zone	Sample #	Height from top of Bulli Coal seam (m)	Processed sample mass (M; in grams)	Palynofacies category																														Lycopodium spores (L)	Lycopodium spores (L/N)	Total count (N)	Lithofacies
					Palynomorphs															Phytoclasts											AOM
					Plant spores			Pollen			Plant spores (% mio-spores)	Phytoplankton			Fungal debris			Subtotal (n)	Subtotal (% N)	Opaque			Brown					Opaque/ brown	Subtotal (n)	Subtotal (% N)	Parti-culate (≥5 μm)	Resin	Subtotal (n)	Subtotal (% N)
					n	% total (N)	% palyn	n	% total (N)	% palyn		n	% total (N)	% palyn	n	% total (N)	% palyn			n	% total (N)	% phyto	Other trans-lucent	Tracheids & rays	Cuticles & mem-branes	% total (N)	% phyto
239.75	A. tenuispinosus	S014137	565.33	-	28	5.6	63.6364	10	2	22.7273	73.6842	6	1.2	13.6364	0	0	0	44	8.8	17	3.4	4.10628	216	119	62	79.4	95.8937	0.0428212	414	82.8	40	2	42	8.4	-	-	500
267.55	A. tenuispinosus	S014136	537.53	-	26	5.2	65	11	2.2	27.5	70.2703	3	0.6	7.5	0	0	0	40	8	25	5	5.68182	182	149	84	83	94.3182	0.060241	440	88	20	0	20	4	-	-	500
290.74	A. tenuispinosus	S014135	514.34	-	19	3.8	57.5758	10	2	30.303	65.5172	4	0.8	12.1212	0	0	0	33	6.6	18	3.6	4.11899	220	181	18	83.8	95.881	0.0429594	437	87.4	30	0	30	6	-	-	500
320.1	A. tenuispinosus	S014134	484.98	-	144	28.8	84.7059	19	3.8	11.1765	88.3436	7	1.4	4.11765	0	0	0	170	34	12	2.4	3.85852	85	144	70	59.8	96.1415	0.0401338	311	62.2	19	0	19	3.8	-	-	500
354	A. tenuispinosus	S014133	451.08	-	39	7.8	63.9344	21	4.2	34.4262	65	1	0.2	1.63934	0	0	0	61	12.2	37	7.4	8.8729	187	142	51	76	91.1271	0.0973684	417	83.4	22	0	22	4.4	-	-	500
362	A. tenuispinosus	S014132	443.08	-	45	9	64.2857	24	4.8	34.2857	65.2174	1	0.2	1.42857	0	0	0	70	14	57	11.4	13.5714	184	162	17	72.6	86.4286	0.157025	420	84	10	0	10	2	-	-	500
383.48	A. tenuispinosus	S014131	421.6	-	66	13.2	64.7059	29	5.8	28.4314	69.4737	5	1	4.90196	2	0.4	1.96078	102	20.4	5	1	1.4245	93	164	89	69.2	98.5755	0.0144509	351	70.2	47	0	47	9.4	-	-	500
439.95	P. samoilovichii	S014129	365.13	-	28	5.6	62.2222	10	2	22.2222	73.6842	7	1.4	15.5556	0	0	0	45	9	9	1.8	2.91262	68	19	213	60	97.0874	0.03	309	61.8	146	0	146	29.2	-	-	500
477.2	P. samoilovichii	S014128	327.88	-	41	8.2	64.0625	17	3.4	26.5625	70.6897	6	1.2	9.375	0	0	0	64	12.8	9	1.8	2.77778	93	48	174	63	97.2222	0.0285714	324	64.8	112	0	112	22.4	-	-	500
514.85	P. samoilovichii	S014127	290.23	-	71	14.2	71	14	2.8	14	83.5294	12	2.4	12	3	0.6	3	100	20	13	2.6	4.0625	140	95	72	61.4	95.9375	0.0423453	320	64	80	0	80	16	-	-	500
559.6	P. samoilovichii	S014126	245.48	-	29	5.8	54.717	15	3	28.3019	65.9091	9	1.8	16.9811	0	0	0	53	10.6	29	5.8	8.95062	156	105	34	59	91.0494	0.0983051	324	64.8	123	0	123	24.6	-	-	500
587.47	P. samoilovichii	S014125	217.61	-	47	9.4	57.3171	27	5.4	32.9268	63.5135	8	1.6	9.7561	0	0	0	82	16.4	22	4.4	5.61224	166	169	35	74	94.3878	0.0594595	392	78.4	26	0	26	5.2	-	-	500
614.33	P. samoilovichii	S014124	190.75	-	18	3.6	52.9412	14	2.8	41.1765	56.25	2	0.4	5.88235	0	0	0	34	6.8	27	5.4	6.19266	234	166	9	81.8	93.8073	0.0660147	436	87.2	29	1	30	6	-	-	500
637.36	P. samoilovichii	S014123	167.72	-	5	1	55.5556	1	0.2	11.1111	83.3333	1	0.2	11.1111	2	0.4	22.2222	9	1.8	10	2	4.4843	182	26	5	42.6	95.5157	0.0469484	223	44.6	268	0	268	53.6	-	-	500
661.09	P. samoilovichii	S014122	143.99	-	4	0.8	36.3636	4	0.8	36.3636	50	3	0.6	27.2727	0	0	0	11	2.2	30	6	11.0294	218	19	5	48.4	88.9706	0.123967	272	54.4	217	0	217	43.4	-	-	500
675.68	P. samoilovichii	S014121	129.4	-	12	2.4	54.5455	9	1.8	40.9091	57.1429	1	0.2	4.54545	0	0	0	22	4.4	17	3.4	6.36704	224	23	3	50	93.633	0.068	267	53.4	210	1	211	42.2	-	-	500
699.07	P. samoilovichii	S014120	106.01	-	21	4.2	46.6667	22	4.4	48.8889	48.8372	2	0.4	4.44444	0	0	0	45	9	26	5.2	6.46766	202	167	7	75.2	93.5323	0.0691489	402	80.4	53	0	53	10.6	-	-	500
709.24	P. samoilovichii	S014119	95.84	-	3	0.6	50	2	0.4	33.3333	60	1	0.2	16.6667	0	0	0	6	1.2	56	11.2	11.5464	312	116	1	85.8	88.4536	0.130536	485	97	9	0	9	1.8	-	-	500
728.11	P. samoilovichii	S014118	76.97	-	7	1.4	41.1765	7	1.4	41.1765	50	3	0.6	17.6471	0	0	0	17	3.4	15	3	3.17797	260	167	30	91.4	96.822	0.0328228	472	94.4	10	1	11	2.2	-	-	500
745.62	P. samoilovichii	S014117	59.46	-	34	6.8	50.7463	26	5.2	38.806	56.6667	7	1.4	10.4478	0	0	0	67	13.4	23	4.6	5.98958	193	160	8	72.2	94.0104	0.0637119	384	76.8	49	0	49	9.8	-	-	500
760.09	L. pellucidus	S014116	44.99	-	9	1.8	52.9412	7	1.4	41.1765	56.25	1	0.2	5.88235	0	0	0	17	3.4	47	9.4	10.0213	306	111	5	84.4	89.9787	0.111374	469	93.8	14	0	14	2.8	-	-	500
773.96	P. microcorpus	S014115	31.12	-	17	3.4	45.9459	11	2.2	29.7297	60.7143	9	1.8	24.3243	0	0	0	37	7.4	12	2.4	3.22581	271	72	17	72	96.7742	0.0333333	372	74.4	91	0	91	18.2	-	-	500
778.57	P. microcorpus	S014114	26.51	-	22	4.4	34.375	39	7.8	60.9375	36.0656	3	0.6	4.6875	0	0	0	64	12.8	43	8.6	11.0825	228	106	11	69	88.9175	0.124638	388	77.6	48	0	48	9.6	-	-	500
781.18	P. microcorpus	S014113	23.9	-	14	2.8	41.1765	14	2.8	41.1765	50	6	1.2	17.6471	0	0	0	34	6.8	21	4.2	7.69231	190	61	1	50.4	92.3077	0.0833333	273	54.6	193	0	193	38.6	-	-	500
781.95	P. crenulata	S014149	23.13	25	6	1.2	42.8571	5	1	35.7143	54.5455	3	0.6	21.4286	0	0	0	14	2.8	58	11.6	13.9759	306	41	10	71.4	86.0241	0.162465	415	83	69	2	71	14.2	52	0.104	500	Claystone
782.27	P. crenulata	S014112	22.81	-	10	2	58.8235	6	1.2	35.2941	62.5	1	0.2	5.88235	0	0	0	17	3.4	46	9.2	10.8235	327	51	1	75.8	89.1765	0.121372	425	85	58	0	58	11.6	-	-	500
783.21	P. crenulata	S014111	21.87	-	11	2.2	55	7	1.4	35	61.1111	2	0.4	10	0	0	0	20	4	34	6.8	7.50552	354	62	3	83.8	92.4945	0.0811456	453	90.6	27	0	27	5.4	-	-	500
783.45	P. crenulata	S014148	21.63	29	35	7	46.0526	33	6.6	43.4211	51.4706	8	1.6	10.5263	0	0	0	76	15.2	37	7.4	9.58549	262	82	5	69.8	90.4145	0.106017	386	77.2	38	0	38	7.6	5	0.01	500	Siltstone
786.37	P. crenulata	S014108	18.71	-	21	4.2	48.8372	13	2.6	30.2326	61.7647	9	1.8	20.9302	0	0	0	43	8.6	40	8	8.96861	321	79	6	81.2	91.0314	0.0985222	446	89.2	11	0	11	2.2	-	-	500
786.65	P. crenulata	S014147	18.43	31	15	3	45.4545	14	2.8	42.4242	51.7241	4	0.8	12.1212	0	0	0	33	6.6	52	10.4	11.4035	321	79	4	80.8	88.5965	0.128713	456	91.2	10	1	11	2.2	1	0.002	500	Clay/siltstone
787.52	P. crenulata	S014107	17.56	-	27	5.4	45	29	5.8	48.3333	48.2143	4	0.8	6.66667	0	0	0	60	12	37	7.4	8.7886	340	41	3	76.8	91.2114	0.0963542	421	84.2	18	1	19	3.8	-	-	500
788.2	P. crenulata	S014106	16.88	-	31	6.2	43.662	27	5.4	38.0282	53.4483	13	2.6	18.3099	0	0	0	71	14.2	67	13.4	16.8342	275	50	6	66.2	83.1658	0.202417	398	79.6	31	0	31	6.2	-	-	500
792.85	P. crenulata	S014105	12.23	-	12	2.4	70.5882	4	0.8	23.5294	75	1	0.2	5.88235	0	0	0	17	3.4	80	16	17.4672	310	63	5	75.6	82.5328	0.21164	458	91.6	25	0	25	5	-	-	500
798.85	P. crenulata	S014146	6.23	31	31	6.2	55.3571	10	2	17.8571	75.6098	15	3	26.7857	0	0	0	56	11.2	82	16.4	33.1984	103	48	14	33	66.8016	0.49697	247	49.4	196	1	197	39.4	9	0.018	500	Fine SST
799.56	P. crenulata	S014104	5.52	-	24	4.8	53.3333	10	2	22.2222	70.5882	11	2.2	24.4444	0	0	0	45	9	82	16.4	30.3704	154	27	7	37.6	69.6296	0.43617	270	54	185	0	185	37	-	-	500
801.11	P. crenulata	S014103	3.97	-	21	4.2	65.625	6	1.2	18.75	77.7778	5	1	15.625	0	0	0	32	6.4	19	3.8	7.72358	159	63	5	45.4	92.2764	0.0837004	246	49.2	222	0	222	44.4	-	-	500
802.97	P. crenulata	S014102	2.11	-	12	2.4	54.5455	1	0.2	4.54545	92.3077	9	1.8	40.9091	0	0	0	22	4.4	27	5.4	15.7895	115	29	0	28.8	84.2105	0.1875	171	34.2	307	0	307	61.4	-	-	500
804.08	P. crenulata	S014145	1	29	19	3.8	61.2903	12	2.4	38.7097	61.2903	0	0	0	0	0	0	31	6.2	85	17	18.3983	319	51	7	75.4	81.6017	0.225464	462	92.4	6	1	7	1.4	0	0	500	Siltstone
805.03	P. crenulata	S014101	0.05	-	25	5	60.9756	16	3.2	39.0244	60.9756	0	0	0	0	0	0	41	8.2	74	14.8	16.3717	311	63	4	75.6	83.6283	0.195767	452	90.4	7	0	7	1.4	-	-	500
Putative base of extinction interval
810.09	D. parvithola	S014100	-5.01	-	10	2	58.8235	7	1.4	41.1765	58.8235	0	0	0	0	0	0	17	3.4	126	25.2	26.087	318	39	0	71.4	73.913	0.352941	483	96.6	0	0	0	0	-	-	500
810.92	D. parvithola	S014144	-5.84	18.3	20	4	58.8235	14	2.8	41.1765	58.8235	0	0	0	0	0	0	34	6.8	88	17.6	19.2982	321	42	5	73.6	80.7018	0.23913	456	91.2	10	0	10	2	1	0.002	500	Carbonaceous siltstone
811.08	D. parvithola	S014143	-6	29	38	7.6	70.3704	16	3.2	29.6296	70.3704	0	0	0	0	0	0	54	10.8	55	11	12.9412	305	58	7	74	87.0588	0.148649	425	85	21	0	21	4.2	0	0	500	Fine SST/Silt
811.67	D. parvithola	S014142	-6.59	24	22	4.4	66.6667	11	2.2	33.3333	66.6667	0	0	0	0	0	0	33	6.6	77	15.4	16.4882	334	53	3	78	83.5118	0.197436	467	93.4	0	0	0	0	0	0	500	Fine SST/Silt
814.96	D. parvithola	S014141	-9.88	32	13	2.6	72.2222	5	1	27.7778	72.2222	0	0	0	0	0	0	18	3.6	100	20	20.7469	329	45	8	76.4	79.2531	0.26178	482	96.4	0	0	0	0	1	0.002	500	N/A
815.94	D. parvithola	S014140	-10.86	33	46	9.2	62.1622	27	5.4	36.4865	63.0137	1	0.2	1.35135	0	0	0	74	14.8	68	13.6	16.307	279	58	12	69.8	83.693	0.194842	417	83.4	9	0	9	1.8	3	0.006	500	N/A
819.48	D. parvithola	S014099	-14.4	-	19	3.8	67.8571	9	1.8	32.1429	67.8571	0	0	0	0	0	0	28	5.6	96	19.2	20.4691	306	66	1	74.6	79.5309	0.257373	469	93.8	3	0	3	0.6	-	-	500
820.64	D. parvithola	S014139	-15.56	33	18	3.6	78.2609	4	0.8	17.3913	81.8182	0	0	0	1	0.2	4.34783	23	4.6	58	11.6	12.3142	377	29	7	82.6	87.6858	0.140436	471	94.2	6	0	6	1.2	1	0.002	500	Carbonaceous siltstone
822.7	D. parvithola	S014138	-17.62	20	55	11	74.3243	19	3.8	25.6757	74.3243	0	0	0	0	0	0	74	14.8	48	9.6	11.5385	297	56	15	73.6	88.4615	0.130435	416	83.2	10	0	10	2	0	0	500	N/A
840.32	D. parvithola	S014098	-35.24	-	30	6	63.8298	17	3.4	36.1702	63.8298	0	0	0	0	0	0	47	9.4	51	10.2	12.1429	303	51	15	73.8	87.8571	0.138211	420	84	33	0	33	6.6	-	-	500
860.37	D. parvithola	S014097	-55.29	-	18	3.6	52.9412	16	3.2	47.0588	52.9412	0	0	0	0	0	0	34	6.8	40	7.8	8.68597	331	62	16	82	91.314	0.095122	449	89.8	17	0	17	3.4	-	-	500
880.32	D. parvithola	S014096	-75.24	-	19	3.8	42.2222	26	5.2	57.7778	42.2222	0	0	0	0	0	0	45	9	45	9	10.4408	307	64	15	77.2	89.5592	0.11658	431	86.2	24	0	24	4.8	-	-	500
900.22	D. parvithola	S014095	-95.14	-	47	9.4	71.2121	18	3.6	27.2727	72.3077	0	0	0	1	0.2	1.51515	66	13.2	46	9.2	12.3656	259	60	7	65.2	87.6344	0.141104	372	74.4	62	0	62	12.4	-	-	500
				TOTALS	1404			745				194			9			2352		2297			12653	4203	1212				20366		3271	11	3282		73		26000

## Sheet: Palynofacies CCC-27
TABLE A4.2. PALYNOFACIES COUNTS FOR COALCLIFF COLLIERY DDH 27 (CCC-27), INCLUDING PERCENTAGES AND PALYNOMORPH CONCENTRATIONS
Depth (m)	Spore-pollen zone	Sample #	Height from top of Bulli Coal seam (m)	Processed sample mass (M; in grams)	Palynofacies category																														Lycopodium spores	Lycopodium spores (L/N)	Total count (N)	Lithofacies
					Palynomorphs															Phytoclasts											AOM
					Plant spores			Pollen			Plant spores (% mio-spores)	Phytoplankton			Fungal debris			Subtotal (n)	Subtotal (% N)	Opaque			Brown					Opaque/ brown	Subtotal (n)	Subtotal (% N)	Parti-culate (≥5 μm)	Resin	Subtotal (n)	Subtotal (% N)
					n	% total (N)	% palyn	n	% total (N)	% palyn		n	% total (N)	% palyn	n	% total (N)	% palyn			n	% total (N)	% phyto	Other trans-lucent	Tracheids & rays	Cuticles & mem-branes	% total (N)	% phyto
348.19	L. pellucidus	S014175	-126.99	24	25	5	34.7222	29	5.8	40.2778	46.2963	18	3.6	25	0	0	0	72	14.4	74	14.8	18.1818	103	194	36	66.6	81.8182	0.222222	407	81.4	21	0	21	4.2	0	0	500	Fine SST
401.3	P. microcorpus	S014174	-73.88	25	20	4	51.2821	15	3	38.4615	57.1429	4	0.8	10.2564	0	0	0	39	7.8	69	13.8	17.4684	133	157	36	65.2	82.5316	0.211656	395	79	66	0	66	13.2	1	0.002	500	Siltstone
410.61	P. microcorpus	S014173	-64.57	25	6	1.2	66.6667	0	0	0	100	3	0.6	33.3333	0	0	0	9	1.8	64	12.8	14.8148	174	179	15	73.6	85.1852	0.173913	432	86.4	59	0	59	11.8	3	0.006	500	Siltstone/fine SST
427.1	P. microcorpus	S014172	-48.08	25	8	1.6	40	9	1.8	45	47.0588	3	0.6	15	0	0	0	20	4	52	10.4	11.3786	212	170	23	81	88.6214	0.128395	457	91.4	23	0	23	4.6	5	0.01	500	Clay/siltstone
432.16	P. crenulata	S014171	-43.02	25	8	1.6	57.1429	1	0.2	7.14286	88.8889	5	1	35.7143	0	0	0	14	2.8	96	19.2	20.339	279	95	2	75.2	79.661	0.255319	472	94.4	14	0	14	2.8	19	0.038	500	Siltstone
438.48	P. crenulata	S014170	-36.7	25	22	4.4	53.6585	10	2	24.3902	68.75	9	1.8	21.9512	0	0	0	41	8.2	22	4.4	5.56962	128	203	42	74.6	94.4304	0.0589812	395	79	64	0	64	12.8	1	0.002	500	Clay/siltstone
445.62	P. crenulata	S014169	-29.56	25	4	0.8	50	2	0.4	25	66.6667	2	0.4	25	0	0	0	8	1.6	47	9.4	10.3524	195	207	5	81.4	89.6476	0.115479	454	90.8	38	0	38	7.6	23	0.046	500	Siltstone
449.26	P. crenulata	S014168	-25.92	25	1	0.2	100	0	0	0	100	0	0	0	0	0	0	1	0.2	73	14.6	16.1148	250	130	0	76	83.8852	0.192105	453	90.6	45	1	46	9.2	64	0.128	500	Siltstone
452.08	P. crenulata	S014167	-23.1	25	4	0.8	80	0	0	0	100	1	0.2	20	0	0	0	5	1	48	9.6	9.89691	261	176	0	87.4	90.1031	0.10984	485	97	10	0	10	2	14	0.028	500	Siltstone
454.1	P. crenulata	S014166	-21.08	25	9	1.8	60	4	0.8	26.6667	69.2308	2	0.4	13.3333	0	0	0	15	3	117	23.4	26	213	111	9	66.6	74	0.351351	450	90	35	0	35	7	1	0.002	500	Siltstone
461.75	P. crenulata	S014165	-13.43	25	4	0.8	57.1429	1	0.2	14.2857	80	2	0.4	28.5714	0	0	0	7	1.4	44	8.8	11.2532	249	92	6	69.4	88.7468	0.126801	391	78.2	101	1	102	20.4	14	0.028	500	Siltstone/fine SST
462	P. crenulata	S014164	-13.18	25	13	2.6	68.4211	2	0.4	10.5263	86.6667	4	0.8	21.0526	0	0	0	19	3.8	40	8	9.30233	250	126	14	78	90.6977	0.102564	430	86	51	0	51	10.2	4	0.008	500	Siltstone
464.5	P. crenulata	S014163	-10.68	25	15	3	39.4737	13	2.6	34.2105	53.5714	10	2	26.3158	0	0	0	38	7.6	62	12.4	17.4157	164	109	21	58.8	82.5843	0.210884	356	71.2	106	0	106	21.2	1	0.002	500	Siltstone
469.55	P. crenulata	S014162	-5.63	25	23	4.6	43.3962	21	4.2	39.6226	52.2727	9	1.8	16.9811	0	0	0	53	10.6	67	13.4	16.8766	196	104	30	66	83.1234	0.20303	397	79.4	47	3	50	10	9	0.018	500	Fine SST
470.3	P. crenulata	S014161	-4.88	25	12	2.4	52.1739	5	1	21.7391	70.5882	6	1.2	26.087	0	0	0	23	4.6	58	11.6	13.2118	256	100	25	76.2	86.7882	0.152231	439	87.8	38	0	38	7.6	4	0.008	500	Fine SST
472.5	P. crenulata	S014160	-2.68	20	41	8.2	63.0769	12	2.4	18.4615	77.3585	12	2.4	18.4615	0	0	0	65	13	61	12.2	15.404	190	93	52	67	84.596	0.18209	396	79.2	37	2	39	7.8	0	0	500	Siltstone
472.85	P. crenulata	S014159	-2.33	25	18	3.6	47.3684	16	3.2	42.1053	52.9412	4	0.8	10.5263	0	0	0	38	7.6	39	7.8	8.80361	277	86	41	80.8	91.1964	0.0965347	443	88.6	19	0	19	3.8	1	0.002	500	Siltstone/fine SST
474	P. crenulata	S014158	-1.18	15.5	11	2.2	50	9	1.8	40.9091	55	2	0.4	9.09091	0	0	0	22	4.4	24	4.8	11.7073	138	30	13	36.2	88.2927	0.132597	205	41	273	0	273	54.6	9	0.018	500	Fine SST
474.8	P. crenulata	S014157	-0.38	13.4	10	2	43.4783	10	2	43.4783	50	3	0.6	13.0435	0	0	0	23	4.6	31	6.2	7.2093	302	79	18	79.8	92.7907	0.0776942	430	86	47	0	47	9.4	3	0.006	500	Claystone
474.9	P. crenulata	S014156	-0.28	17.5	25	5	32.0513	28	5.6	35.8974	47.1698	25	5	32.0513	0	0	0	78	15.6	27	5.4	7.43802	226	77	33	67.2	92.562	0.0803571	363	72.6	59	0	59	11.8	4	0.008	500	Claystone
475.15	P. crenulata	S014155	-0.03	13.5	19	3.8	30.1587	20	4	31.746	48.7179	24	4.8	38.0952	0	0	0	63	12.6	35	7	8.21596	299	72	20	78.2	91.784	0.0895141	426	85.2	11	0	11	2.2	1	0.002	500	Siltstone
Putative base of extinction interval
477.6	D. parvithola	S014154	2.42	18	21	4.2	56.7568	16	3.2	43.2432	56.7568	0	0	0	0	0	0	37	7.4	30	6	6.56455	334	82	11	85.4	93.4354	0.0702576	457	91.4	6	0	6	1.2	0	0	500	Carbonaceous siltstone
477.9	D. parvithola	S014153	2.72	12	12	2.4	26.087	34	6.8	73.913	26.087	0	0	0	0	0	0	46	9.2	47	9.4	10.4911	301	93	7	80.2	89.5089	0.117207	448	89.6	6	0	6	1.2	1	0.002	500	Carbonaceous siltstone
478	D. parvithola	S014152	2.82	20	14	2.8	37.8378	23	4.6	62.1622	37.8378	0	0	0	0	0	0	37	7.4	56	11.2	12.362	305	86	6	79.4	87.638	0.141058	453	90.6	10	0	10	2	1	0.002	500	Carbonaceous siltstone
478.05	D. parvithola	S014151	2.87	18	19	3.8	48.7179	20	4	51.2821	48.7179	0	0	0	0	0	0	39	7.8	58	11.6	12.8035	343	45	7	79	87.1965	0.146835	453	90.6	8	0	8	1.6	1	0.002	500	Carbonaceous siltstone
478.12	D. parvithola	S014150	2.94	9.4	9	1.8	27.2727	24	4.8	72.7273	27.2727	0	0	0	0	0	0	33	6.6	95	19	20.8333	342	13	6	72.2	79.1667	0.263158	456	91.2	11	0	11	2.2	0	0	500	Carbonaceous siltstone
			Totals		373			324				148			9			845		1436			6120	2909	478				10943		1205	7	1212		184		13000
